# Supplementary material for: The identification and expression analysis of walnut Acyl-ACP thioesterases
Source: Front Genet. 2024 Jul 29;15:1409159. doi: 10.3389/fgene.2024.1409159 (PMC11317280; doi:10.3389/fgene.2024.1409159)
Supplement: Supplementary file 1 [file Table2.XLSX]

## Sheet: Sheet1
Table S1. Primer list of all JrFats gene
Gene ID	Forward primer	Base number	Reverse primer	Base number	TM (℃)
JrFatB1	CTACTGCTGCTACATCCGCA	20	GGCTTGGGCATTTGTCTTG	19	60
JrFatB4	TGCTTGGAAGGTTTGTGGA	19	GGGTAGCACCAAAGCCATTC	20	58
JrFatA1	GCTCAGTCTTCCAAAGTGGGA	21	CCGCCTGTAATCCAAGGTAAT	21	59
JrFatB2	GCTGGACTTCTTGGTGATGG	20	ATGGACCGACCCAAGTGTCT	20	60
JrFatA2	TTACAGACGGGAGTGCCAAC	20	AAGCCCATCACCTGACAATCT	21	58
JrFatB3	ATGTCCGAACAGGTTTATCACC	22	TTTCTCTCCCACACTCCTTCC	21	58
JrFatB5	ATCACTCAAGGAGGTGTCGG	20	AATCCATTGCTCAGAAGACCAG	22	60
JrFatB6	AAGGGCTCATCAGTCAAGGAG	21	ACCATTGCTCAGAAGACCAGAC	22	60
