# Supplementary material for: The identification and expression analysis of walnut Acyl-ACP thioesterases
Source: Front Genet. 2024 Jul 29;15:1409159. doi: 10.3389/fgene.2024.1409159 (PMC11317280; doi:10.3389/fgene.2024.1409159)
Supplement: Supplementary file 2 [file Table1.XLSX]

## Sheet: Sheet1
Table S2. The sequence of all JrFats gene
Gene name	Gene id	Amino acid sequence
JrFatB1	Jr07_05130	MVATAATSAFFPAVSPTPDYGTKTTSKLSNLGGMKSKSARSSSGLQVKTNAQAPPKINGT SVGLATPVEGVKNECDTLSPAPRTFINTLPDWSMLLAAITTIFLAAEKQWMMLDWKPRRP DMLIDPFGLGRIVQDGLVFRQNFSIRSYEIGADRTASIETLMNHLQETALNHVKSAGLLG DGFGSTPEMCKKNLIWVVTRMQVVVDRYPTWGDVVQVDTWVSPSGKNGMRRDWLLRDSTS GETLTRASSVWVMMNKQTRRLSKIPPEVRGEIEPYFTDTLPVVEEDSRKLQKLDDNTADF VRTGLSPRWSDLDVNQHVNNVKYIGWILESAPLPILESYELSSMTLEYRRECGKDSVLQS LTAVSCNGIGNLGNLADIECQHLLQLENGAEIV…
JrFatB4	Jr12_02760	MASLMAAKGNTRLCLGGDFCKADTKNVATRKISCYPLMDNAIKLKQRSLSVIASARSSRG IDSTINGSKVNRINVGEVAPVMGNKNRESTKEISGVDAPLHAVLLGRFVEDQFVYRQTFI IRSYEIGPDKTATMETLMNLLQETALNHVTSSGLAGNGFGATREMSLRKLIWVVTRIHVQ VQRYSSWGDVVEIDTWVDATGKNGMRRDWIIRDYKTQEIITRATSTWVIMNQETRRLSKI PEQVREEVVPFYLNRVAVASDKNDSEKIDKLTDKTAERIRSGLAPRWSDMDANQHVNNVK YIGWILESVPINVLGNYDLTSMTLEYRRECQQSNLLESLTSSTASGTEDSNNYIHRRPDL EFTHLLRMLADKAEIVRARTQWHSKQKLN
JrFatA1	Jr01_28970	MLKVSCNVLNDQIQALAQCSFLGRPVAGPTFTPLRNPVVSCRHLYKPRVLAVLSDRGGVG SGSGVVGADLGMVRLPGSGSGSLADRLRLGSLTEDGLSYKERFIVRCYEVGINKTATVET IANLLQEVGCNHAQSVGYSTDGFATTPTMRKLNLIWVTARMHIEIYKYPAWSDVVEIETW CQGDGRIGTRRDWIVKDYATGRVIGRATSKWVMMNQETRRLQKVSDDVREEYLVYCPREL RLAIPEENSSSLRKIPKLEDPAQSSKVGLVPRRADLDMNQHVNNVTYIGWVLESMPQEVI DSHELQTITLDYRRECQHDDIVDSLTTMEPLEDAKAVSELQGTNGSAVVKENIEDSRQFL HLLRLSGDGLEINRGRTEWRKKPAR
JrFatB2	Jr02_00610	MVATAATSAFFPAASPAPDSGPKTAKKLANLGGMKSKSAGSSGALQGKASTQASPKINGT SVGLKKPVEGVKNEFETSSPAPRTFINTLPDWSMLLAAITTIFLAAEKQWMMLDWKPRRP DMLIDPFGLGRIVQDGLVFRQNFSIRSYEIGADRTASIETLMNHLQETALNHVKGAGLLG DGFGSTPEMCKKNLIWVVTRMQVVVDRYPTWGDVVQVDTWVGPSGKNGMRRDWVLLDSKT GETLTRASSVWVMMNKQTRRLSKIPEEVRGEIEPYFTDTVPVVEEDSRKLQKLDDNTADY VLTGLSPRWSDLDVNMHVNNVKYIGWILEVDAQVNFFLQFISFSAPLPILESYELSAMTL EYRRECGKDNVLQSLTAVSGSGIGNLGTLADME…
JrFatA2	Jr10_21500	MLNVSCNVSNGQIHALAQCAFLGRCTSTLRINDAIWCRPLRKPPVLVRAVLSERGGAGSS SGVLGSDRVVGSGSASLGDRLRLGSLTEDGLSYKERFIVRCYEVGINKTATVETIANLLQ EVGCNHAQNVGFSTDGFATTPTMRKMHLIWVTARMHIEIYRYPAWSDVVEIETWCQGDGR IGTRRDWIIKDYATDQVIGRATSKWVMMNQETRRLQKVSDDVREEYLVYCPRELRLAIPE ENSTSLKKIPKLEDPAQNSKVGLVPRRSDLDMNQHVNNVTYIGWVLESMPQEVIDSHELQ TITLDYRRECQHDDLVDSLTTVEPVVDATAVSELQEKNGSADVKEYKEDLPQFLHLLRLS GDGLEINRGRTVWRKKPAR
JrFatB3	Jr12_19470	MVELSQTLLNLPVLICRLRGDVVQVETWISASGKHGHTGDWLVRDYITGETHLRATSSRY LMIDKKTRKLSFLKEAWADQIKPHVLDCHEYPIIMGDNRKLLQILDVDTADYVRTGLSPL WNDLDINQYVNYHIKYISWILEGAPRSFLESHKLSAMTVEYRKECGRESMLHNLSAVSRN GTSATNSTDHFTEDEGIEFDHSLYLQDGSEVLRARTMWMPKSI
JrFatB5	Jr13_28660	MTLCVRASKALASTTISAAWHPFALKIRPPAVYKTISYPISPFQSPPIYNNRKAMALFSS YPASCPIIRCSSNRDSHEPNRQKLNNIRIIGTSSAKAAVDHILSHTAGVANTFNSITSVP ENGYIPKEEIRQNIPTRKKLVDPHRQGLITQGGVGYRQTVVIRSYEVGPDKTATLESILN LLQETALNHVWMSGLLSNGFGATHGMVKNNLIWVVSRMQVQVDHYPIWGEIMEIDTWVGA SGKNGMRRDWLVRSQATGLVFARATSTWVMMNQQTRRLSKMPEEVRAEISPWFIEKQAIH EDSPEKIIKLDSKARYMNSNLKPKRSDLDMNHHVNNVKYVRWMLETIPDEILESHQLSSI ILEYRKECGSSDKVQSLCHPDDDGVLKDGLKQT…
JrFatB6	Jr16_02040	MALFSSYSASYSIRCSSNRDNHDQNKQKLNNLRIISTSSRSSNKADILSPTAGVANTFNS ITSIPENGYIPKEEVRQNIPTRKQLVDPHRQGLISQGGVGYMQTVVIRSYEVGPDKTATL ESILNLLQETALNHVWMSGLLSNGFGATHGMVRNNLIWVVSRMQVQVDHYPIWGEVLEID TWVGASGKNGMRRDWLIQSQATGHVFARATSTWVMMNQQTRRLSKMPEEVRDEISPWFIE NQAIKEDSPEKIIKLDSKARYMNSNLKPKRSDLDMNQHVNNVKYVRWMLETIPDEILESR QLSSIILEYRRECGSSDIVQSLCHPDEDGILKDGLKQNNDISLLNGFSLASEILEGGGLL GSYEKAPLRYTHLLQTQGERGSGEIVRGRTTWK…
